# Supplementary material
Source: publisher figshare collection journal article supplement (https://acs.figshare.com/ndownloader/files/4057009)
Supplement: Supplementary file 1 [file 4057009]

# Supporting Information for

## Construction of Supramolecular Pyrene-Modified Metallocycles via Coordination- Driven Self-Assembly and Their Spectroscopic Behavior

Nai-Wei Wu,<sup>†</sup> Jing Zhang,<sup>†</sup> Cirendeji,<sup>‡</sup> Qing Han,<sup>†</sup> Li-Jun Chen,<sup>†</sup> Lin Xu\*<sup>†</sup>  
and Hai-Bo Yang\*<sup>†</sup>

<sup>†</sup>Shanghai Key Laboratory of Green Chemistry and Chemical Processes, Department of Chemistry,  
East China Normal University, 3663 North Zhongshan Road, Shanghai 200062, P. R. China.

<sup>‡</sup>Department of Public Teaching, Tibet Agricultural and Animal Husbandry College, 8 Xueyuan  
Road, Linzhi, Tibet 860000, P.R. China.

E-mail: [lxu@chem.ecnu.edu.cn](mailto:lxu@chem.ecnu.edu.cn), [hbyang@chem.ecnu.edu.cn](mailto:hbyang@chem.ecnu.edu.cn)

### Table of Contents

|                                                                                                             |    |
|-------------------------------------------------------------------------------------------------------------|----|
| 1. Synthesis of compounds <b>2</b> , <b>3</b> , and <b>4</b> .....                                          | 2  |
| 2. <sup>1</sup> H, <sup>13</sup> C NMR and <sup>31</sup> P NMR Spectra of <b>2-6</b> .....                  | 4  |
| 3. <sup>1</sup> H, <sup>31</sup> P NMR and Mass Spectra of Metallocycles <b>8a-b</b> and <b>10a-b</b> ..... | 10 |
| 4. Spectroscopic Behavior of <b>5</b> , <b>6</b> , <b>8a-b</b> , and <b>10a-b</b> .....                     | 15 |

## 1. Synthesis of compounds 2, 3, and 4

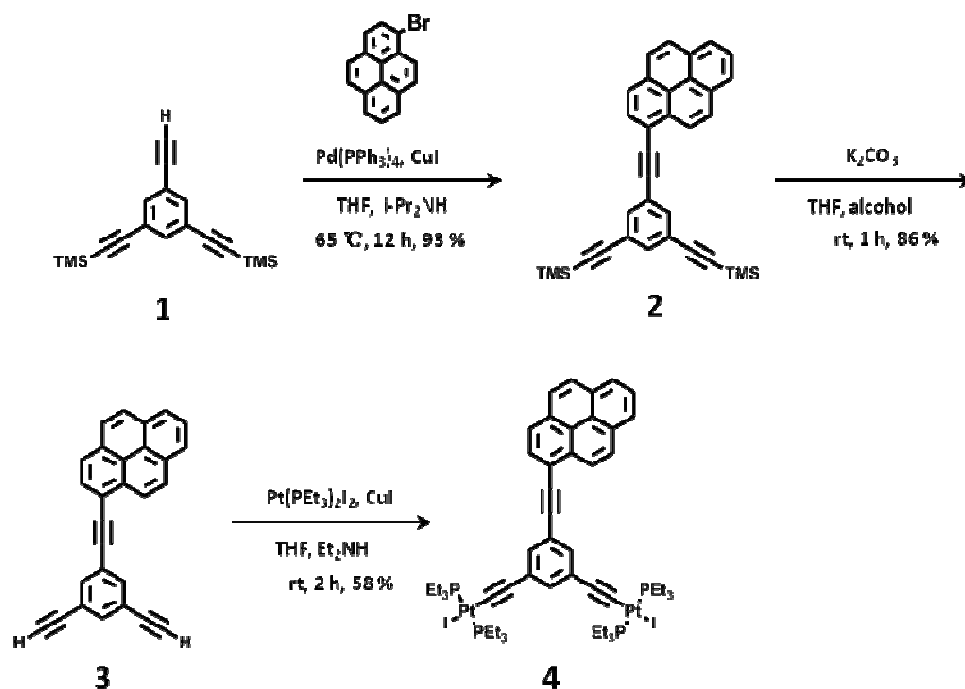

Scheme S1. Synthesis of compounds 2, 3 and 4

**Synthesis of Compound 2.** Under an atmosphere of nitrogen, a mixed solvent of 15 mL THF and 15 mL  $i\text{-Pr}_2\text{NH}$  was added to a mixture of compound 1 (520 mg, 1.76 mmol), 1-bromopyrene (993 mg, 3.52 mmol),  $\text{Pd}(\text{PPh}_3)_4$  (101 mg, 0.088 mmol) and  $\text{CuI}$  (17 mg, 0.088 mmol) in a 100 mL Schlenk flask. The mixture was stirred at  $65\text{ }^\circ\text{C}$  for 12 hours. After then insoluble materials were filtrated and the solvent was removed by evaporation on a rotary evaporator. The residue was purified by column chromatography on silica gel with petroleum ether/dichloromethane (v/v, 8/1) as eluent afforded the light yellow powder of 2 with a yield of 93%:  $R_f = 0.60$  (petroleum ether/dichloromethane, v/v, 8/1). Mp:  $187\text{ }^\circ\text{C}$ .  $^1\text{H}$  NMR ( $\text{CDCl}_3$ , 400 MHz):  $\delta$  8.63 (d,  $J = 9.2\text{ Hz}$ , 1H), 8.26-8.03 (m, 8H), 7.75 (s, 2H), 7.59 (s, 1H), 0.28 (s, 18H).  $^{13}\text{C}$  NMR ( $\text{CDCl}_3$ , 100 MHz):  $\delta$  134.88, 134.54, 131.91, 131.40, 131.12, 130.93, 129.56, 128.42, 128.28, 127.13, 126.21, 125.69, 125.63, 125.29, 124.45, 124.32, 124.15, 124.04, 123.84, 117.03, 103.26, 95.78, 93.28, 89.76, -0.12. MS (EI):  $m/z$  (%) = 494 ( $\text{M}^+$ , 7.50). HRMS calcd for  $\text{C}_{34}\text{H}_{30}\text{Si}_2$ : 494.1886, found: 494.1881.

**Synthesis of Compound 3.** Compound **2** (812 mg, 1.64 mmol) was dissolved in a mixture of 45 mL THF and 25 mL methanol.  $K_2CO_3$  (452 mg, 3.24 mmol) was added and the solution was stirred at room temperature for 1 hour. Insoluble materials were filtrated and the solvent was removed by evaporation on a rotary evaporator. Column chromatography with petroleum ether/dichloromethane (v/v, 4/1) as eluent afforded the yellow solid of compound **3** with a yield of 86%:  $R_f = 0.56$  (petroleum ether/dichloromethane, v/v, 4/1). Mp: 186 °C.  $^1H$  NMR ( $CDCl_3$ , 400 MHz):  $\delta$  8.62 (d,  $J = 9.2$  Hz, 1H), 8.26-7.81 (m, 8H), 7.62 (s, 2H), 7.61 (s, 1H), 3.16 (s, 2H).  $^{13}C$  NMR ( $CDCl_3$ , 100 MHz):  $\delta$  135.14, 135.08, 132.02, 131.56, 131.18, 130.98, 129.66, 128.56, 128.41, 127.19, 126.30, 125.79, 125.73, 125.28, 124.51, 124.41, 124.34, 124.22, 122.99, 116.89, 92.97, 90.12, 81.85, 78.62. MS (EI):  $m/z$  (%) = 350 ( $M^+$ , 9.89). HRMS calcd for  $C_{28}H_{14}$ : 350.1096, found: 350.1094.

**Synthesis of Compound 4.** To a solution of CuI (12 mg, 0.063 mmol) and  $Pt(PEt_3)_2I_2$  (1.56 g, 2.28 mmol) in a mixed solvent of 20 mL THF and 20 mL  $Et_2NH$  was added dropwise a solution of compound **5** (220 mg, 0.628 mmol) in THF (20 mL) under an atmosphere of nitrogen. The mixture was then stirred at room temperature for 2 hours. The solvent was removed in vacuo and the residue was purified via column chromatography with petroleum ether/dichloromethane (v/v, 2/1) as eluent afforded the light yellow solid of **5** with a yield of 58%:  $R_f = 0.51$  (petroleum ether/dichloromethane, v/v, 1/1).  $^1H$  NMR ( $CDCl_3$ , 400 MHz):  $\delta$  8.68-8.65 (d,  $J = 9.2$  Hz, 1H), 8.25-8.02 (m, 8H), 7.42 (s, 2H), 7.22 (s, 1H), 2.29-2.23 (m, 24H), 1.24-1.16 (m, 36H).  $^{13}C$  NMR ( $CDCl_3$ , 100 MHz): 132.86, 131.63, 130.99, 130.94, 130.71, 130.43, 129.30, 128.03, 127.94, 126.96, 126.05, 125.38, 125.14, 124.30, 124.17, 123.98, 123.09, 117.42, 99.17, 94.80, 90.82, 88.18, 16.50, 8.16.  $^{31}P$  NMR ( $CDCl_3$ , 161.9 MHz):  $\delta$  8.58 (s,  $J_{Pt-P} = 2320.0$  Hz) MALDI HRMS:  $m/z$  calcd for  $C_{52}H_{72}I_2P_4Pt_2$ ,  $[M + H]^+$  1465.20, found: 1465.27.

## 2. $^1\text{H}$ NMR, $^{13}\text{C}$ NMR and $^{31}\text{P}$ NMR Spectra of 2-6

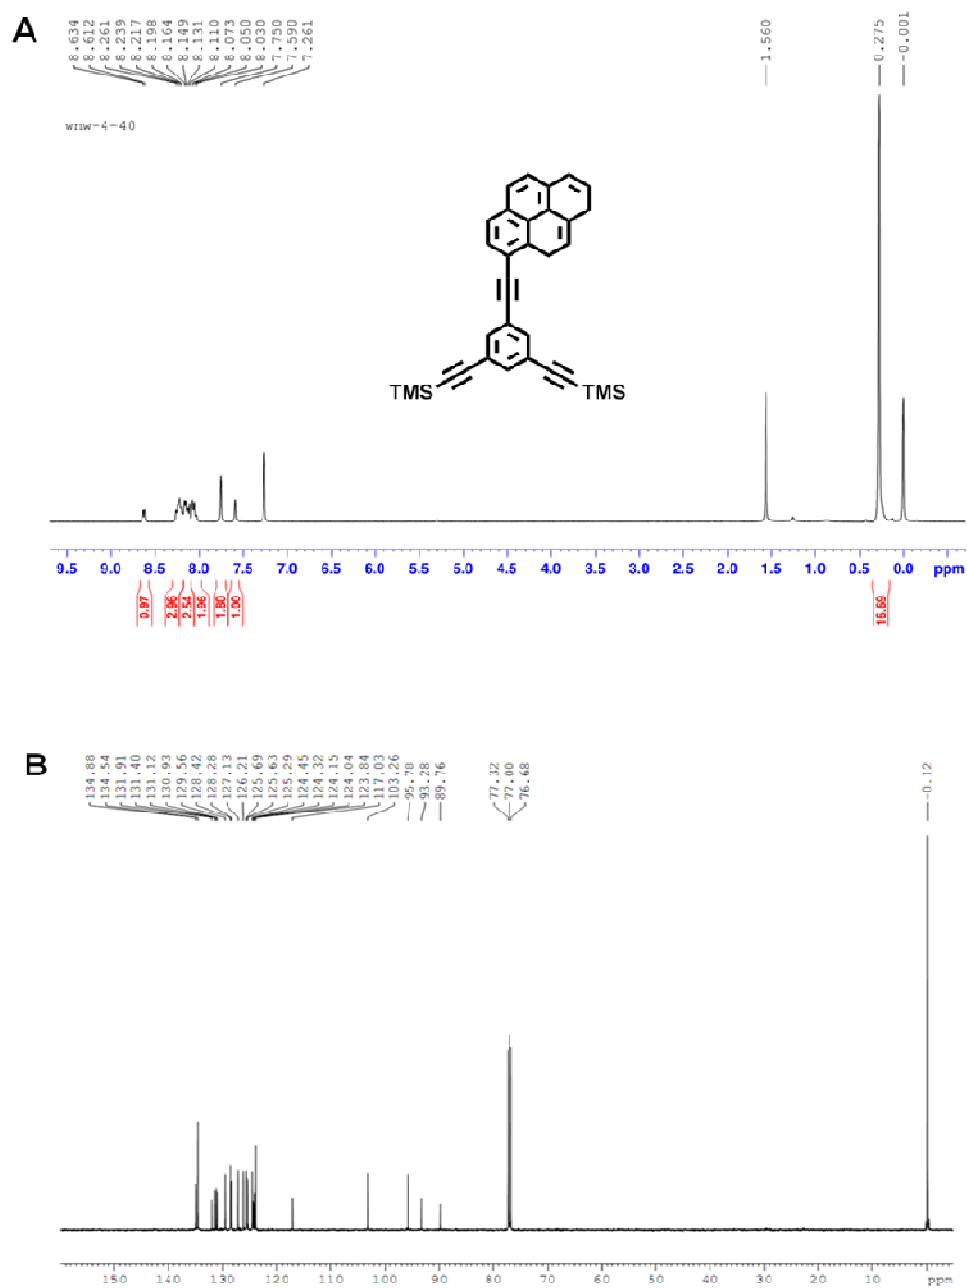

**Figure S1.**  $^1\text{H}$  (A) and  $^{13}\text{C}$  (B) NMR spectra of **2** in CDCl<sub>3</sub>

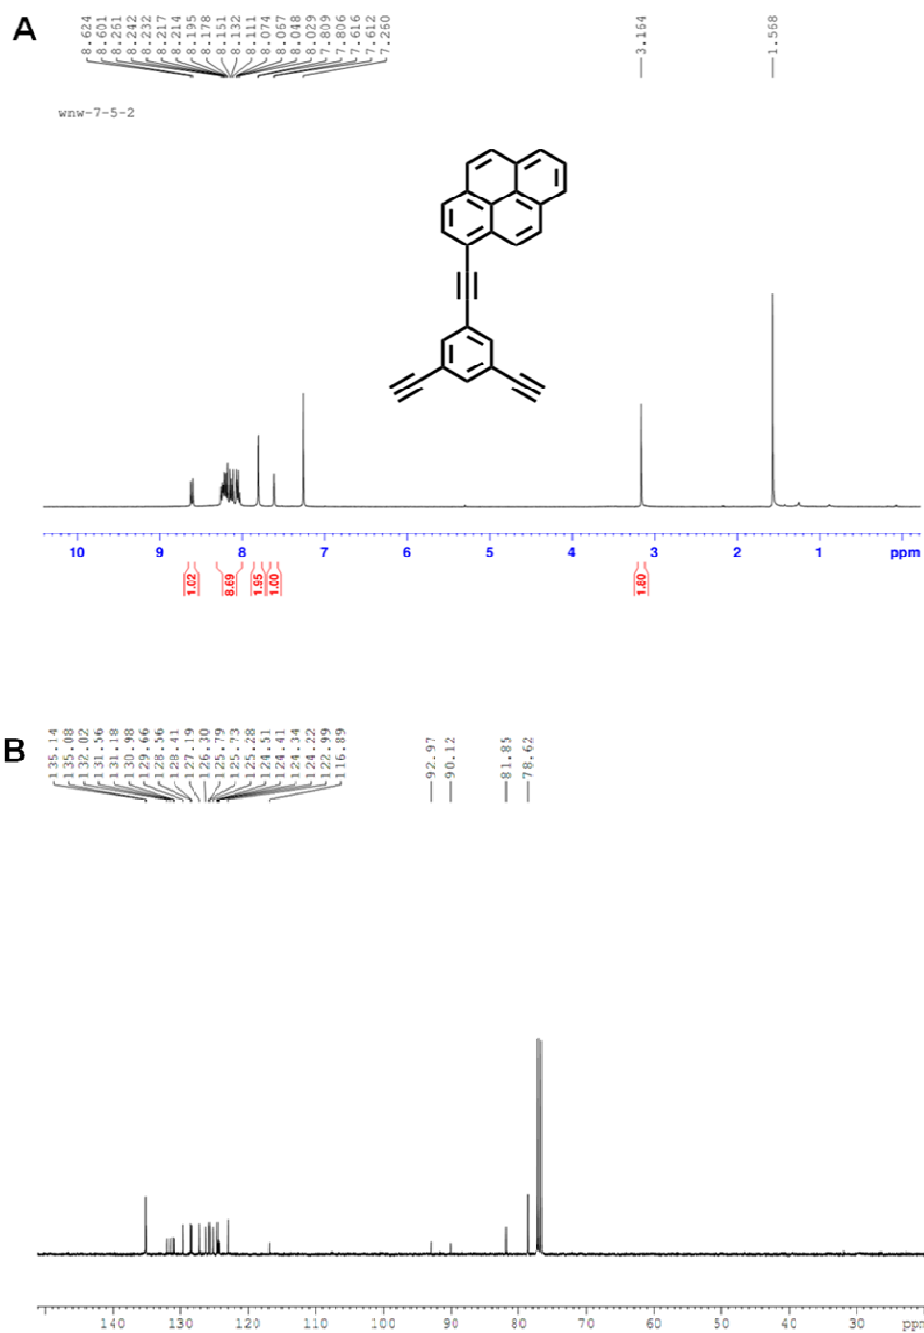

**Figure S2.** <sup>1</sup>H (A) and <sup>13</sup>C (B) NMR spectra of **3** in CDCl<sub>3</sub>

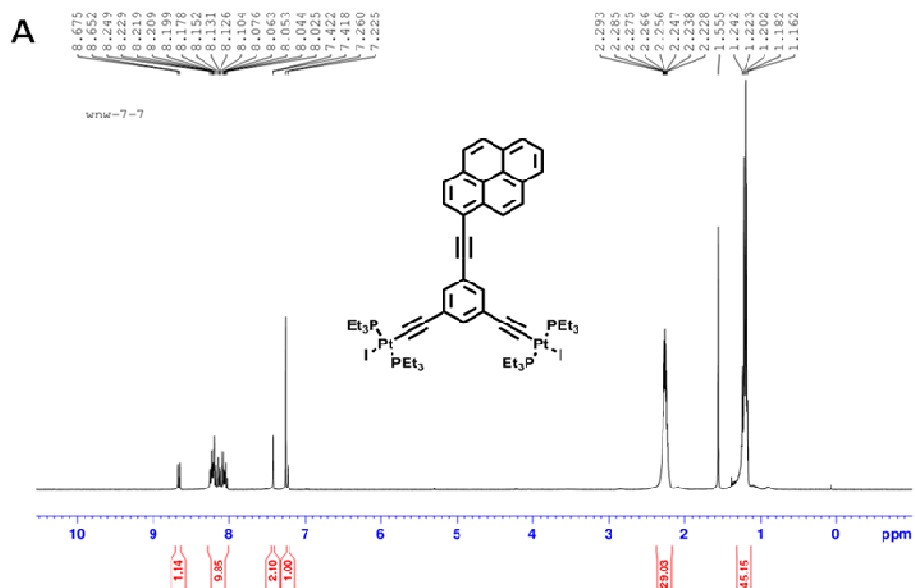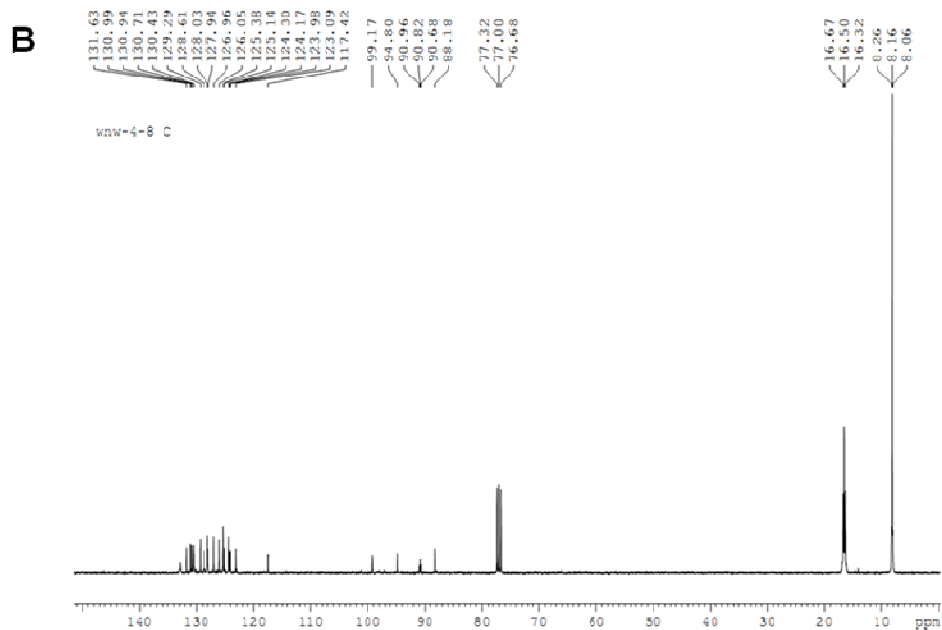

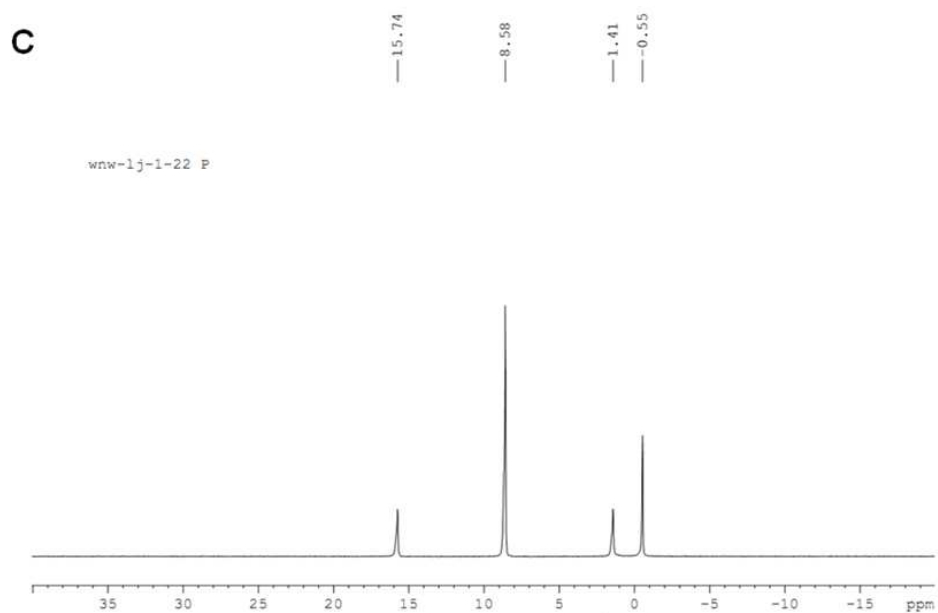

**Figure S3.**  $^1\text{H}$  (A)  $^{13}\text{C}$  (B) and  $^{31}\text{P}$  (C) NMR of **4** in  $\text{CDCl}_3$

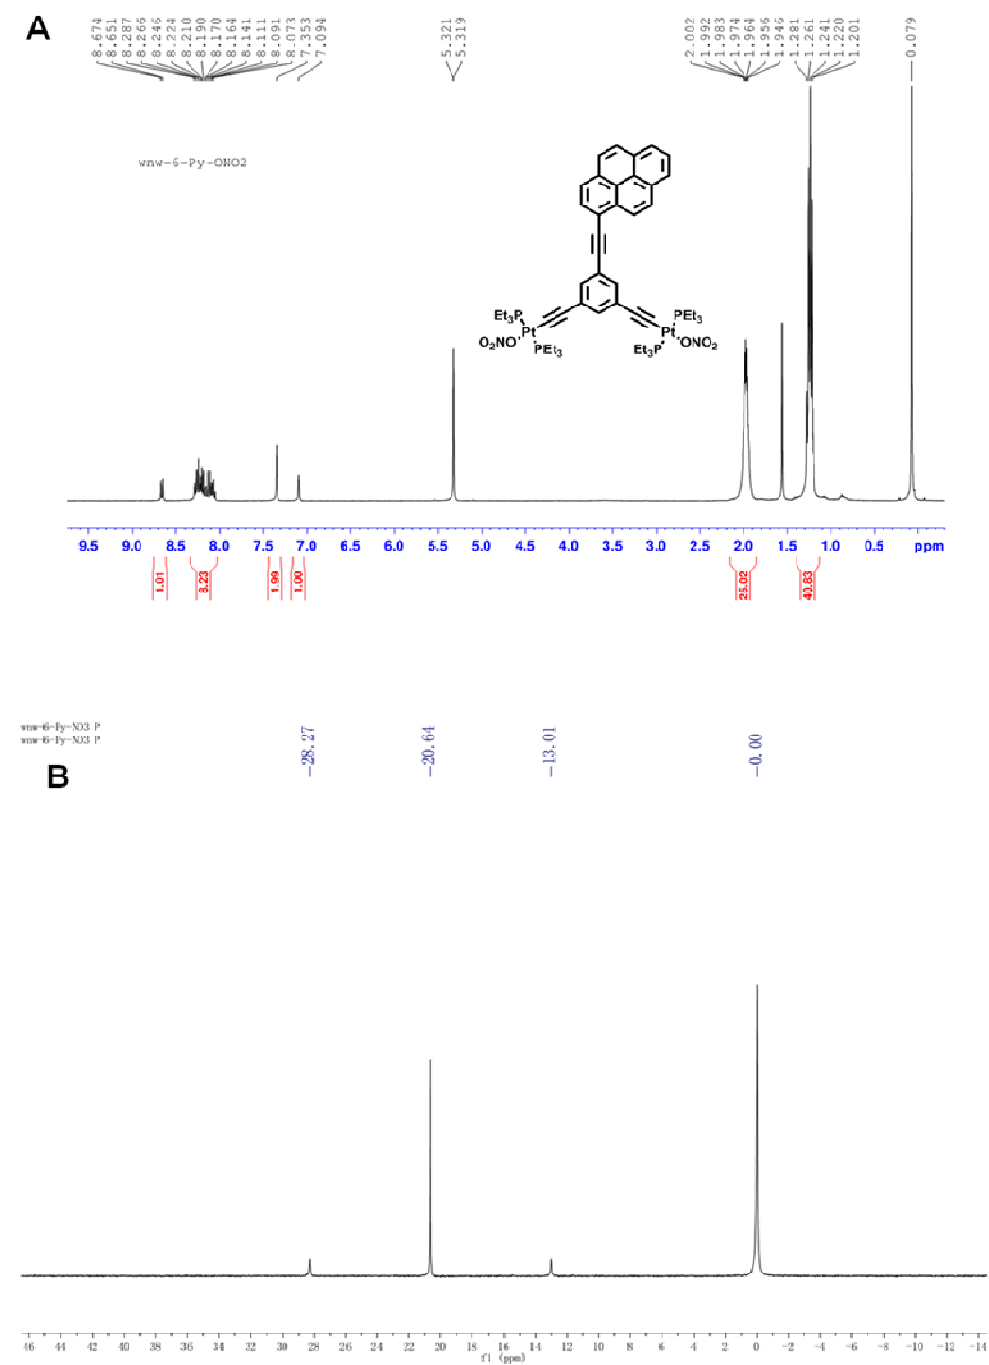

**Figure S4.**  $^1\text{H}$  (A) and  $^{31}\text{P}$  (B) NMR of **5** in CD $_2$ Cl $_2$

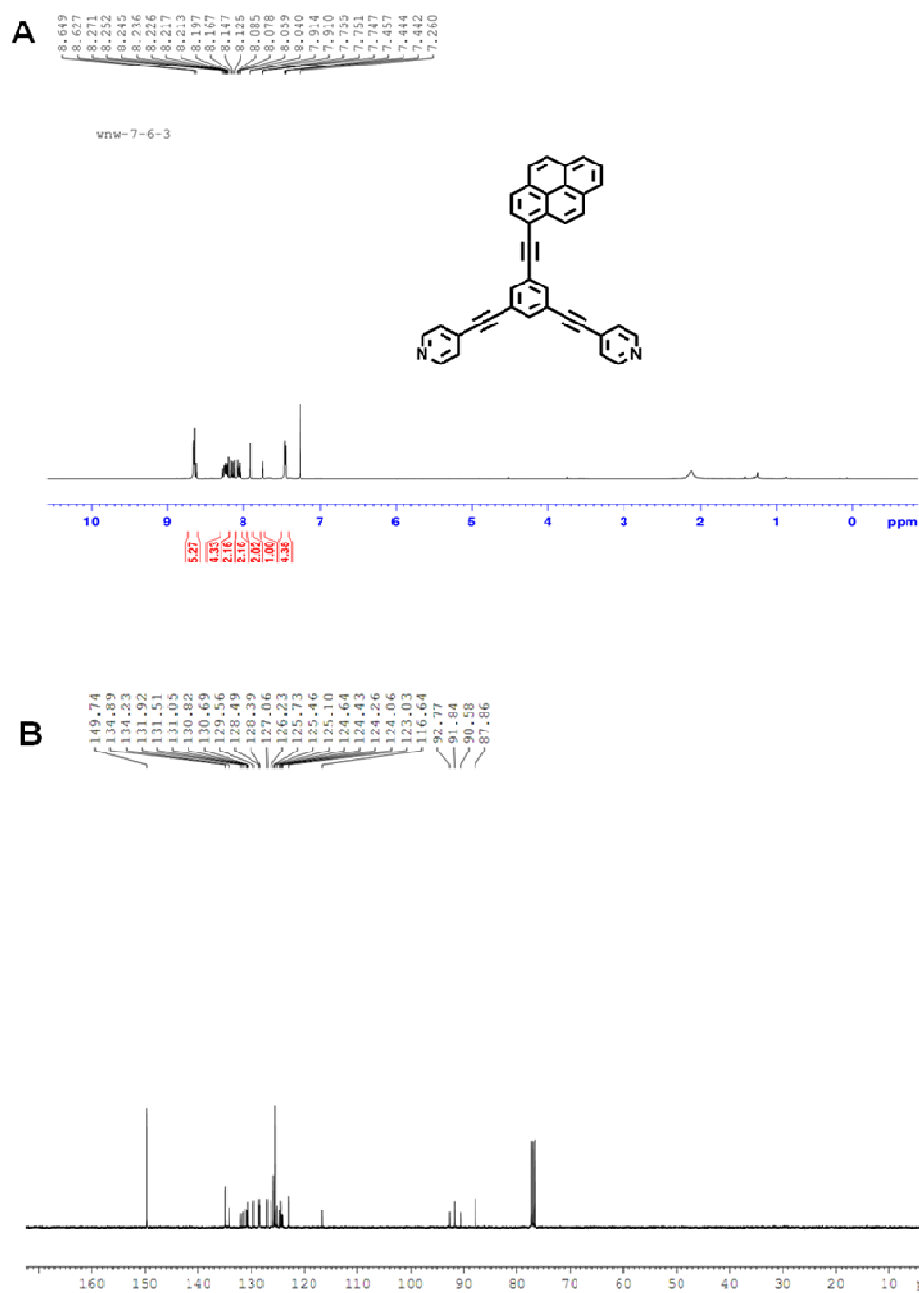

**Figure S5.**  $^1\text{H}$  (A) and  $^{13}\text{C}$  (B) NMR of **6** in  $\text{CDCl}_3$

### 3. $^1\text{H}$ , $^{31}\text{P}$ NMR and Mass Spectra of Metallocycles 8a-b and 10a-b

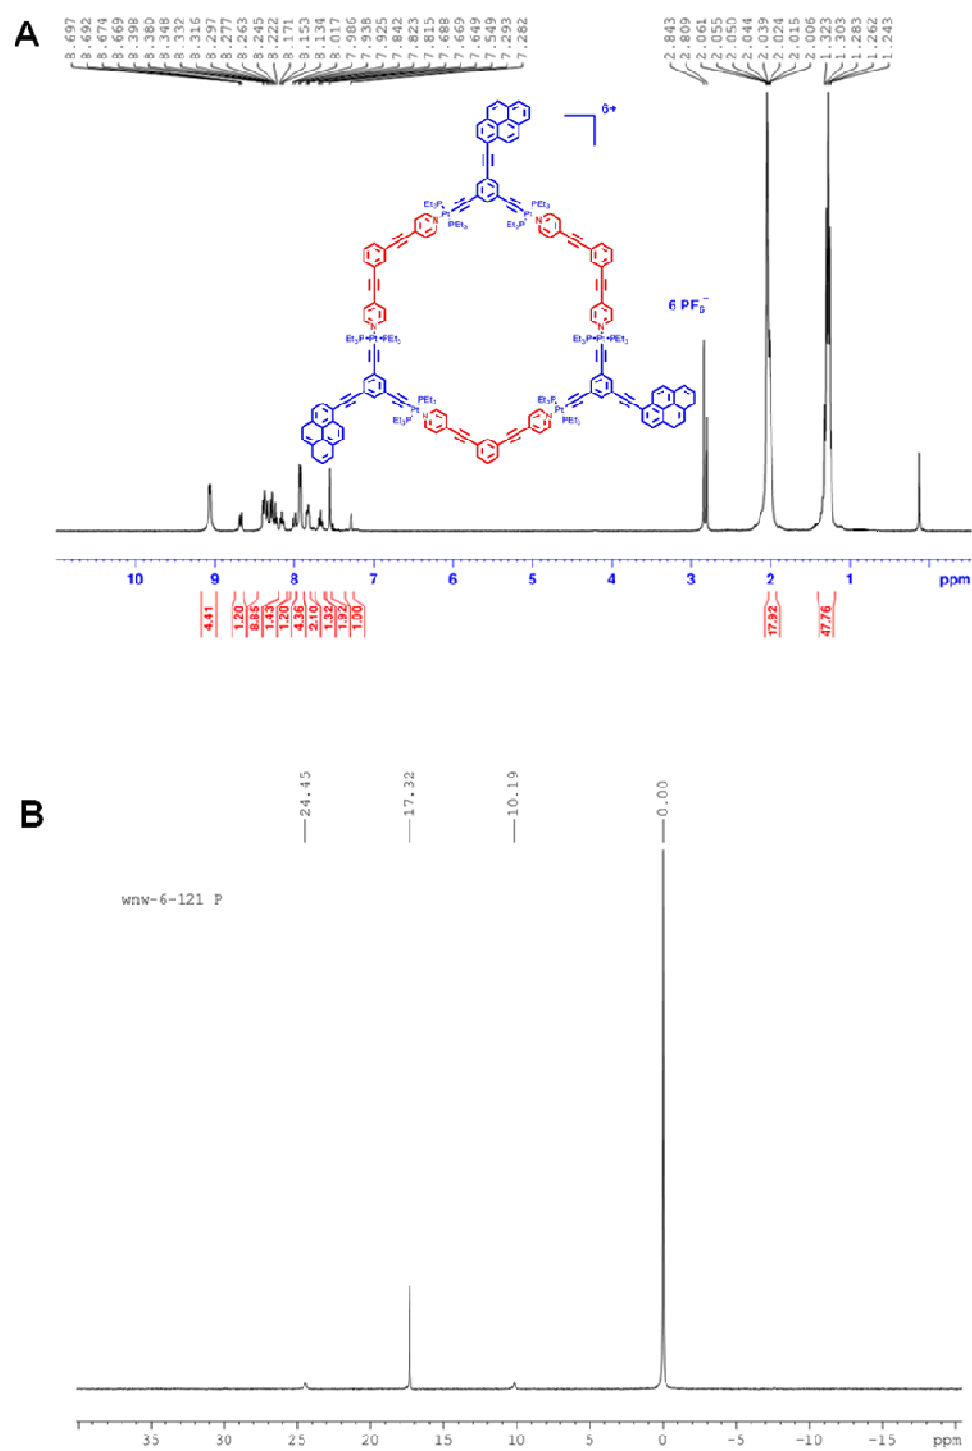

**Figure S6.**  $^1\text{H}$  (A) and  $^{31}\text{P}$  (B) NMR of **8a** in  $\text{acetone-}d_6$

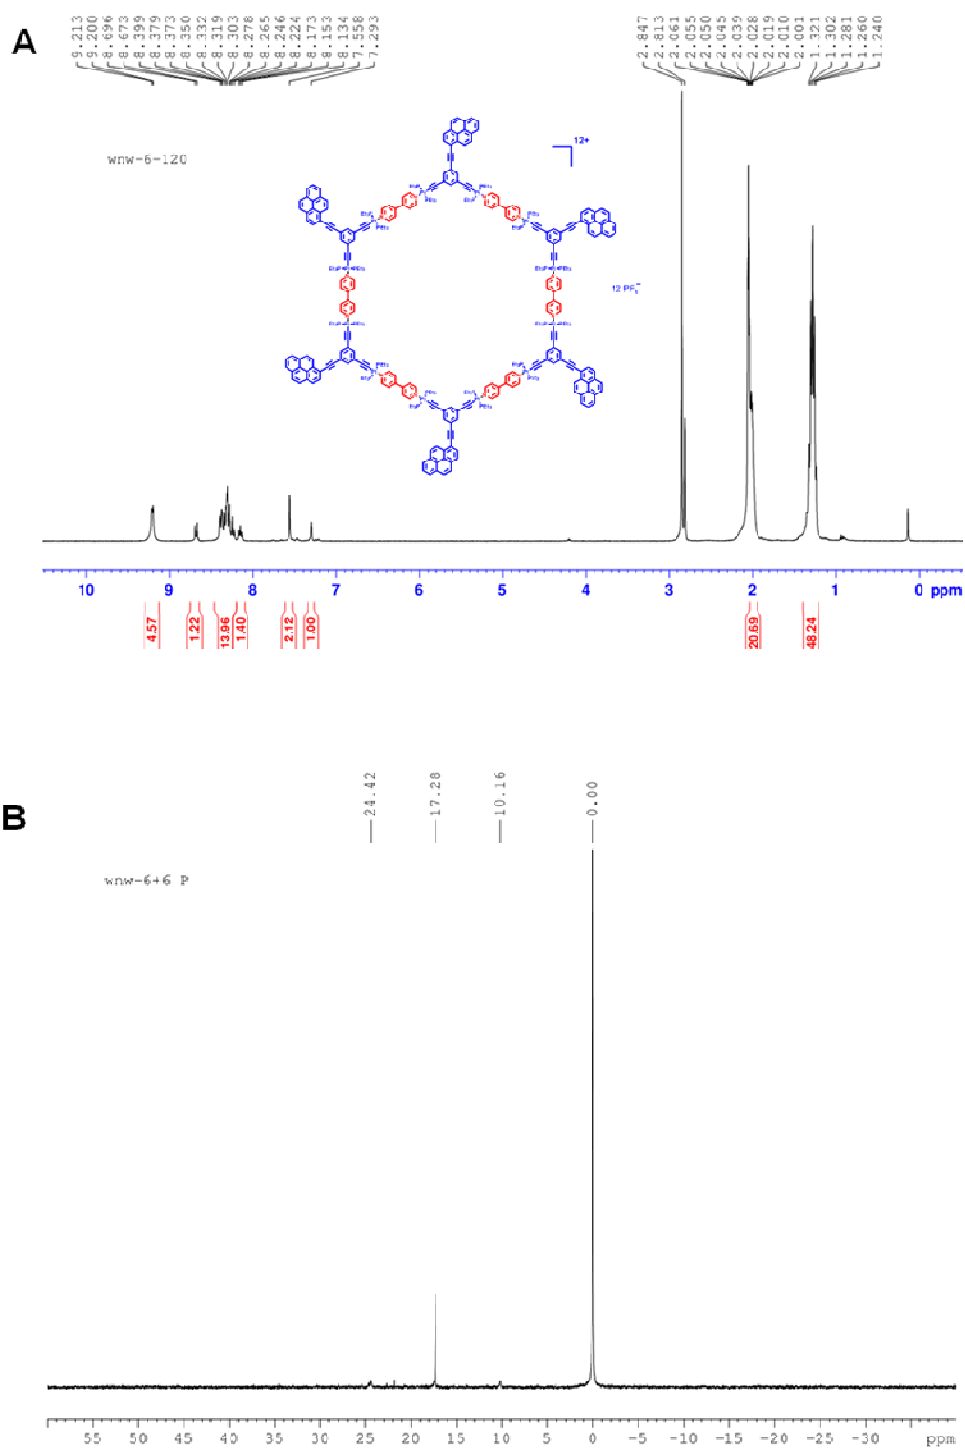

**Figure S7.**  $^1\text{H}$  (A) and  $^{31}\text{P}$  (B) NMR of **8b** in  $\text{CD}_2\text{Cl}_2$

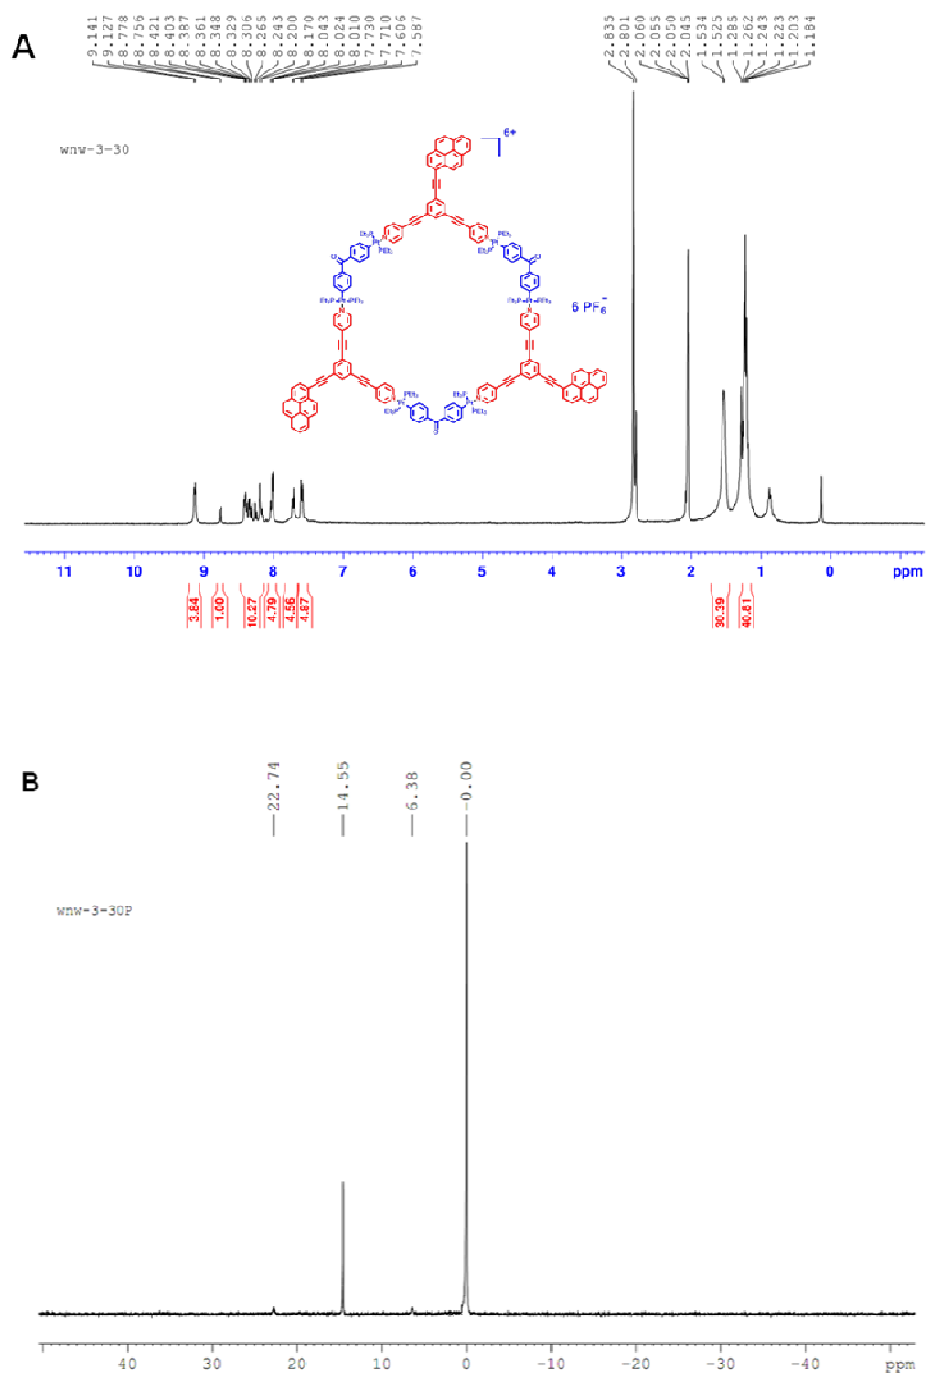

**Figure S8.**  $^1\text{H}$  (A) and  $^{31}\text{P}$  (B) NMR of hexagon **10a** in acetone- $d_6$

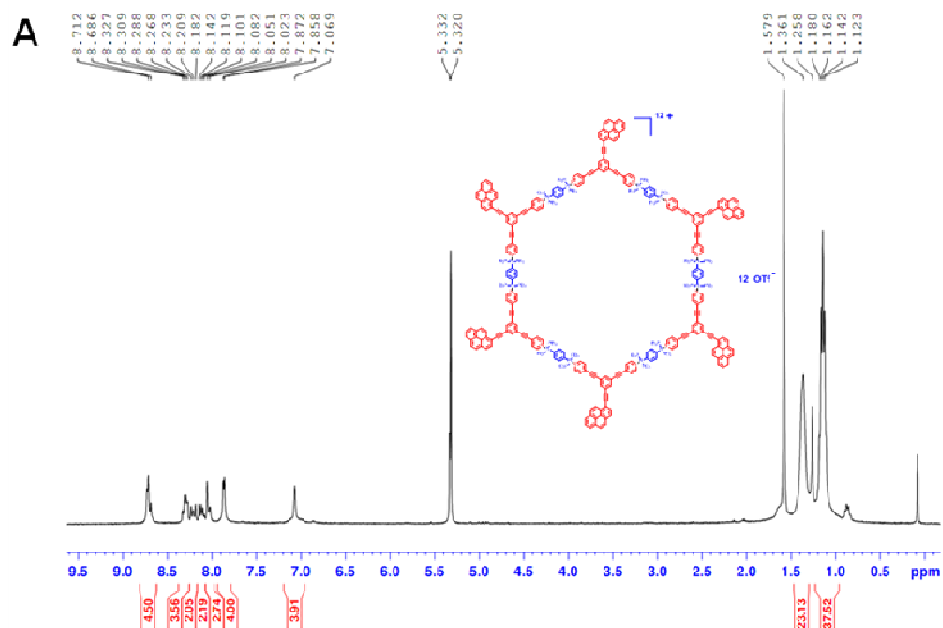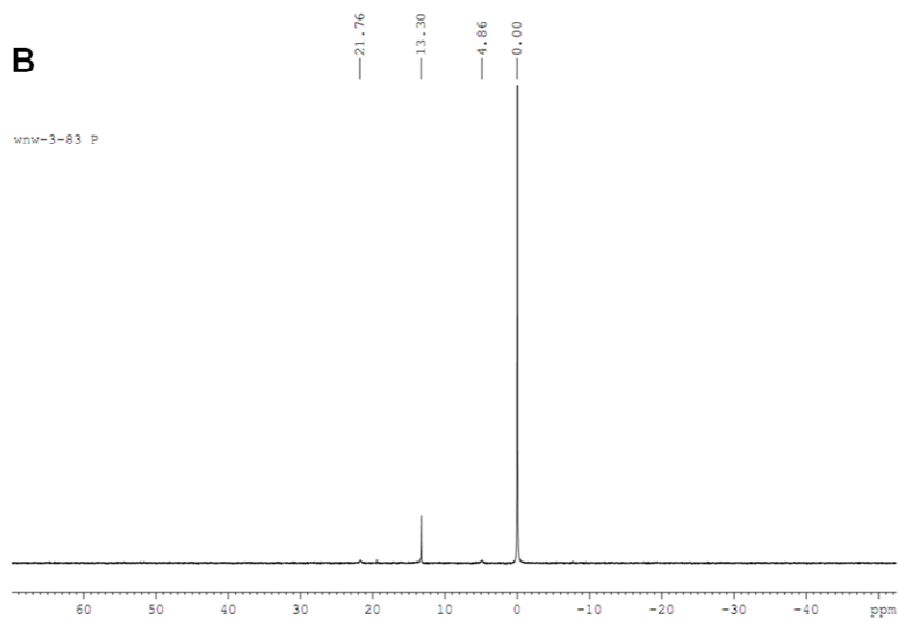

**Figure S9.** <sup>1</sup>H (A) and <sup>31</sup>P (B) NMR of hexagon **10b** in CD<sub>2</sub>Cl<sub>2</sub>.

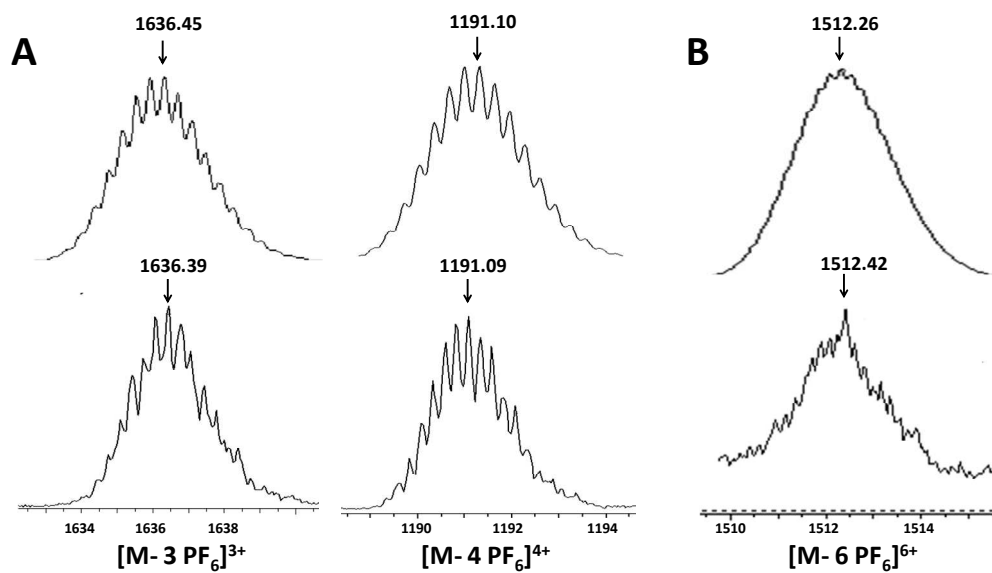

**Figure S10.** Theoretical (top) and experimental (bottom) CSI-TOF-MS results of **8a** (A) and **8b** (B).

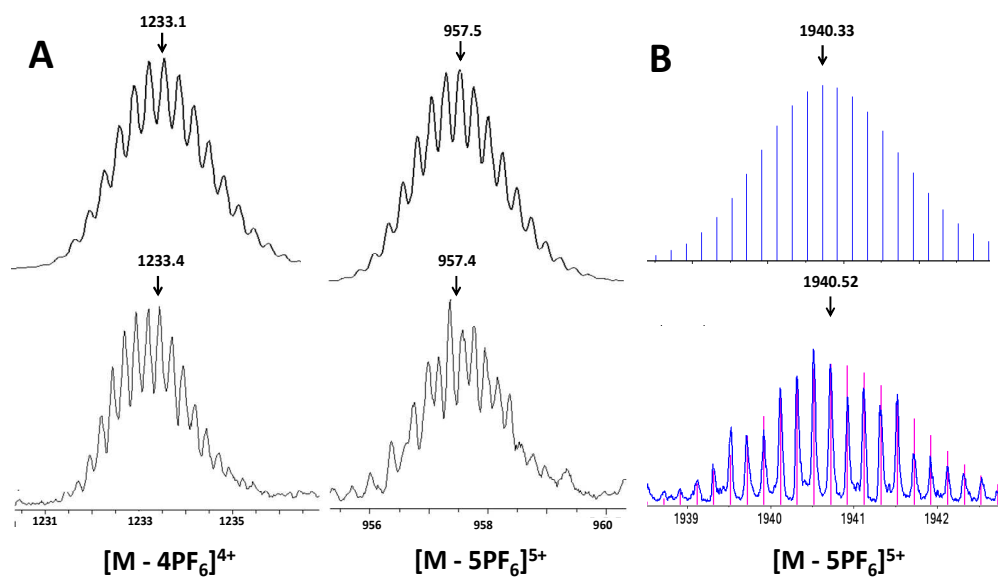

**Figure S11.** Theoretical (top) and experimental (bottom) CSI-TOF-MS results of **10a** (A), and ESI-TOF-MS result of **10b** (B).

#### 4. Spectroscopic Behavior of **5**, **6**, **8a-b** and **10a-b**

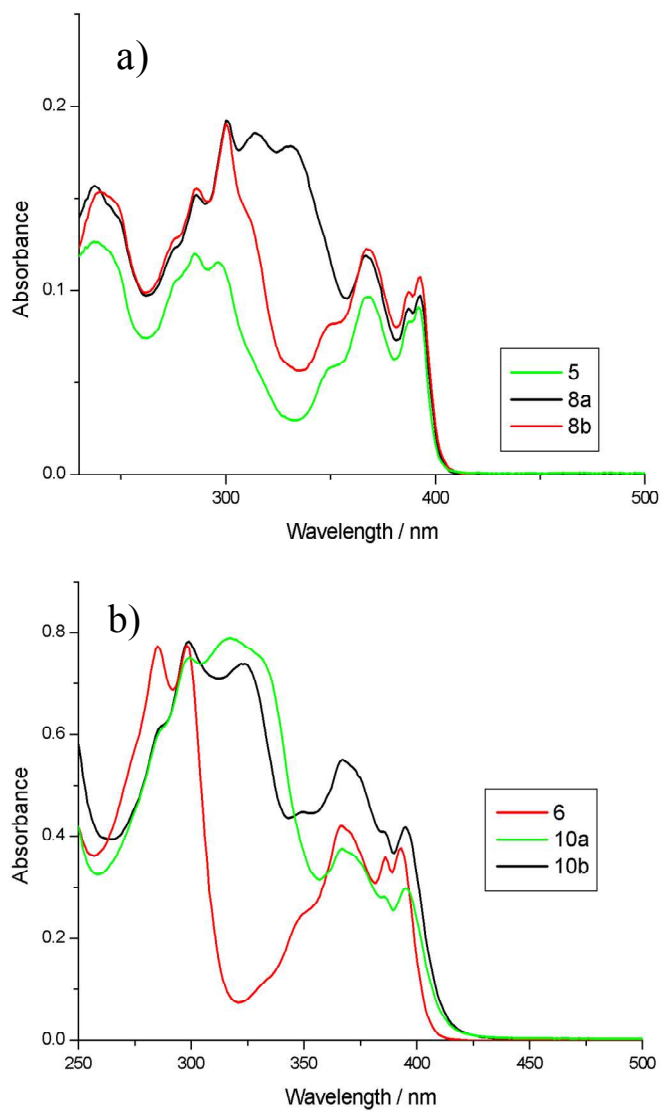

**Figure S12.** Absorption spectra of **5** ( $10^{-5}$  M), **6** ( $10^{-5}$  M), **8a** ( $0.33 \times 10^{-5}$  M), **8b** ( $0.17 \times 10^{-5}$  M), **10a** ( $0.33 \times 10^{-5}$  M) and **10b** ( $0.17 \times 10^{-5}$  M) in  $\text{CH}_2\text{Cl}_2$ .

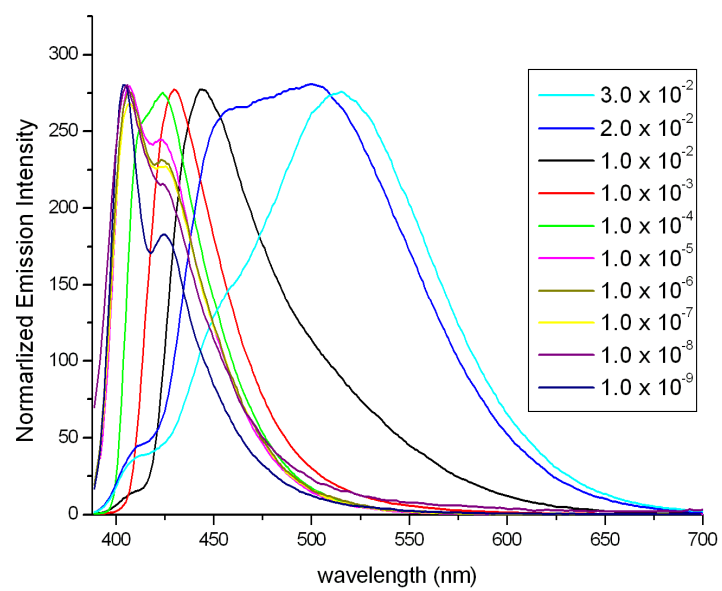

**Figure S13.** Normalized emission titration spectra of **6** in  $\text{CH}_2\text{Cl}_2$ .

**Table S1.** Photophysical Data for **5**, **8a**, **8b**, **6**, **10a**, and **10b**

| Compound<br>(concentration)/M <sup>-1</sup> | Solvent<br>(298K)               | $\lambda_{\text{abs}}$ (nm) | $\epsilon$ (M <sup>-1</sup> cm <sup>-1</sup> ) | $\lambda_{\text{F}}$ (nm) | $\Phi_{\text{F}}$ |
|---------------------------------------------|---------------------------------|-----------------------------|------------------------------------------------|---------------------------|-------------------|
| <b>5</b> ( $1.0 \times 10^{-5}$ )           | CH <sub>2</sub> Cl <sub>2</sub> | 392                         | 91000                                          | 398                       | 0.87              |
|                                             |                                 | 367                         | 97000                                          | 420                       |                   |
|                                             |                                 | 285                         | 120000                                         |                           |                   |
| <b>8a</b> ( $0.33 \times 10^{-5}$ )         | CH <sub>2</sub> Cl <sub>2</sub> | 393                         | 291000                                         | 420                       | 0.030             |
|                                             |                                 | 367                         | 357000                                         |                           |                   |
|                                             |                                 | 300                         | 576000                                         |                           |                   |
| <b>8b</b> ( $0.17 \times 10^{-5}$ )         | CH <sub>2</sub> Cl <sub>2</sub> | 393                         | 642000                                         | 424                       | 0.013             |
|                                             |                                 | 367                         | 738000                                         |                           |                   |
|                                             |                                 | 300                         | 1140000                                        |                           |                   |
| <b>6</b> ( $1.0 \times 10^{-5}$ )           | CH <sub>2</sub> Cl <sub>2</sub> | 392                         | 210160                                         | 407                       | 0.12              |
|                                             |                                 | 367                         | 231956                                         |                           |                   |
|                                             |                                 | 285                         | 310714                                         |                           |                   |
| <b>10a</b> ( $0.33 \times 10^{-5}$ )        | CH <sub>2</sub> Cl <sub>2</sub> | 392                         | 879078                                         | 551                       | 0.0097            |
|                                             |                                 | 367                         | 1078986                                        |                           |                   |
|                                             |                                 | 331                         | 1638720                                        |                           |                   |
|                                             |                                 | 300                         | 1787040                                        |                           |                   |
| <b>10b</b> ( $0.17 \times 10^{-5}$ )        | CH <sub>2</sub> Cl <sub>2</sub> | 392                         | 3490002                                        | 548                       | 0.0032            |
|                                             |                                 | 367                         | 4031046                                        |                           |                   |
|                                             |                                 | 299                         | 6416826                                        |                           |                   |

**Table S2.** Charge Density Data for **5**, **8a**, **8b**, **6**, **10a** and **10b**

|                                            | 5        | 8a       | 8b       | 6        | 10a      | 10b      |
|--------------------------------------------|----------|----------|----------|----------|----------|----------|
| Charge<br>Density<br>(C· m <sup>-2</sup> ) | 0.086166 | 0.133250 | 0.148520 | 0.101246 | 0.150779 | 0.150779 |
